# Supplementary material for: KIN‐4/MAST kinase promotes PTEN‐mediated longevity of Caenorhabditis elegans via binding through a PDZ domain
Source: PubMed Central journal article supplement (PMC6516182; doi:10.1111/acel.12906), 2019-02-17

**Figure S1**

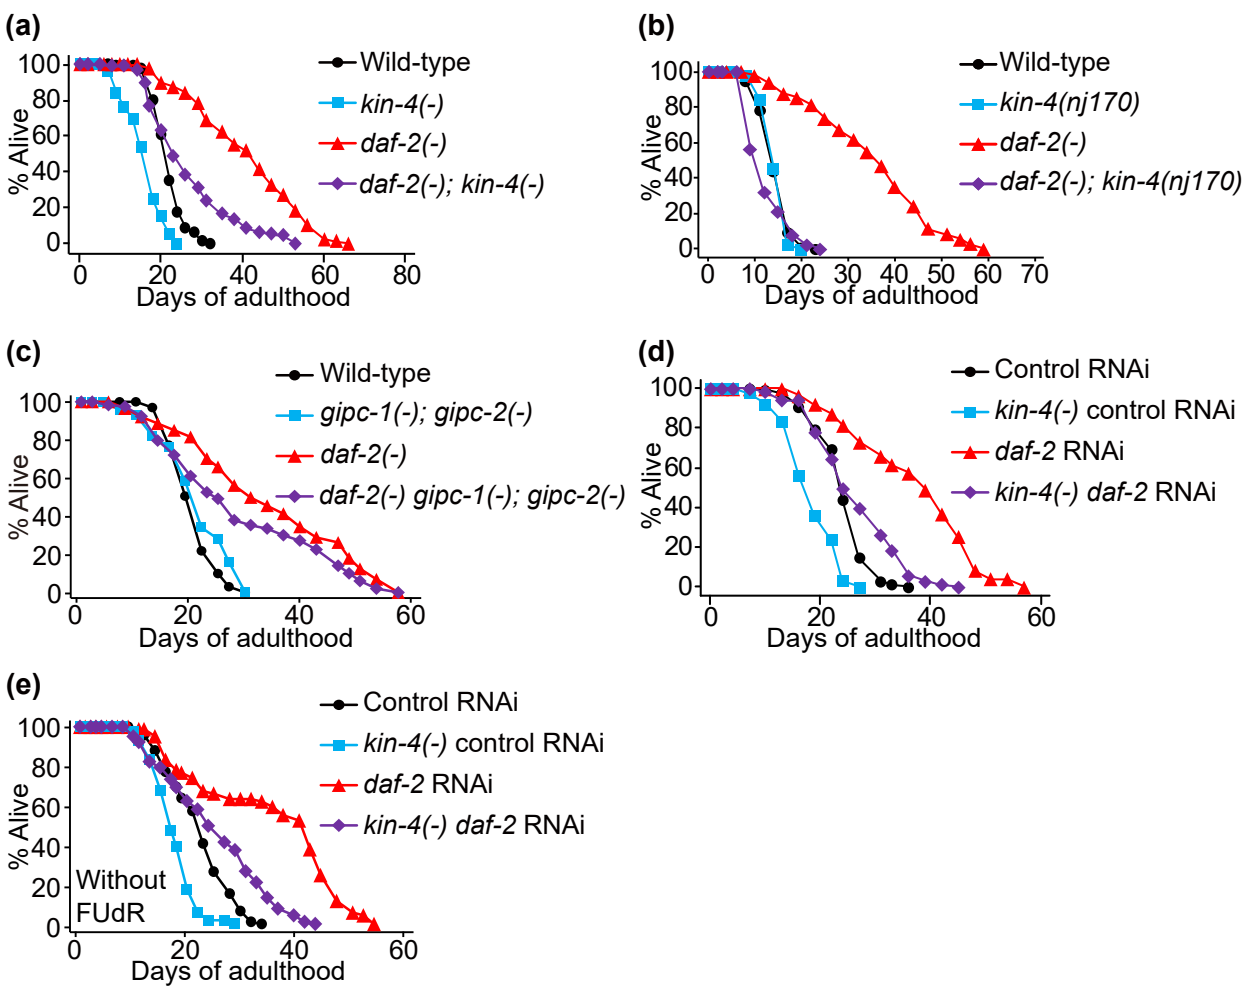

**Figure S2**

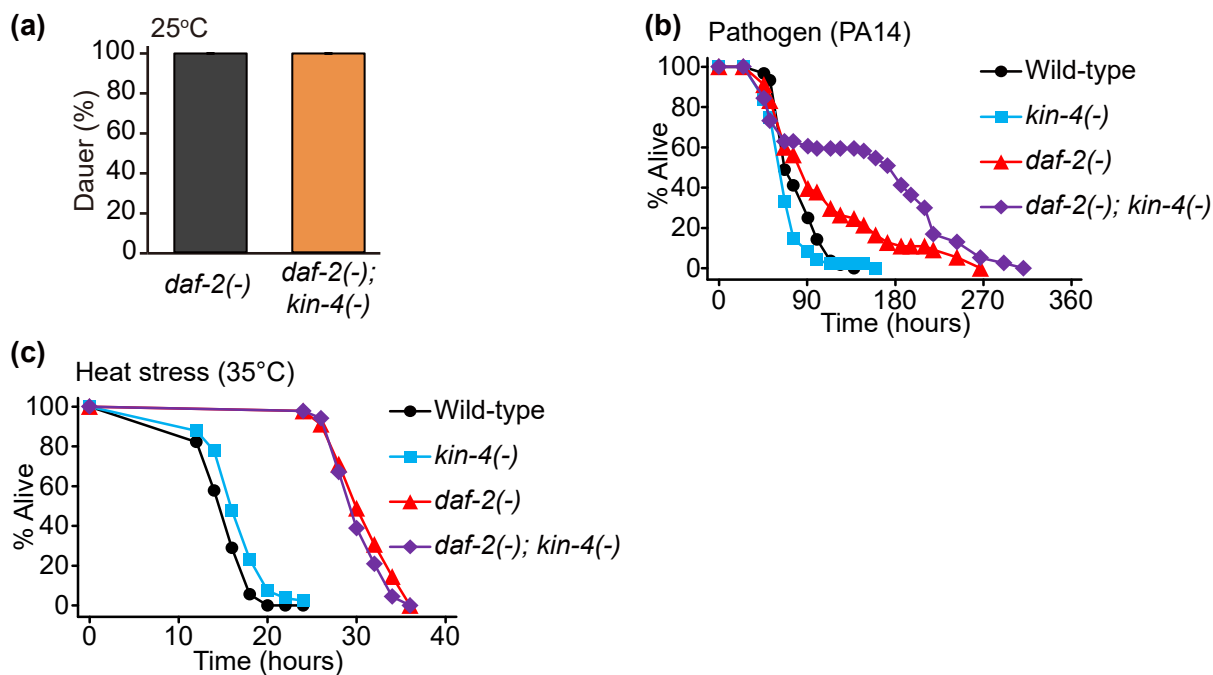

# Figure S3

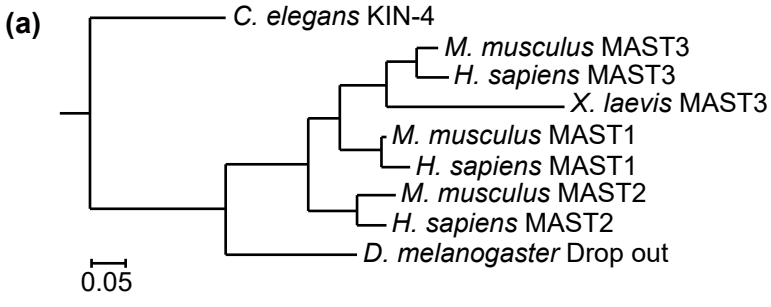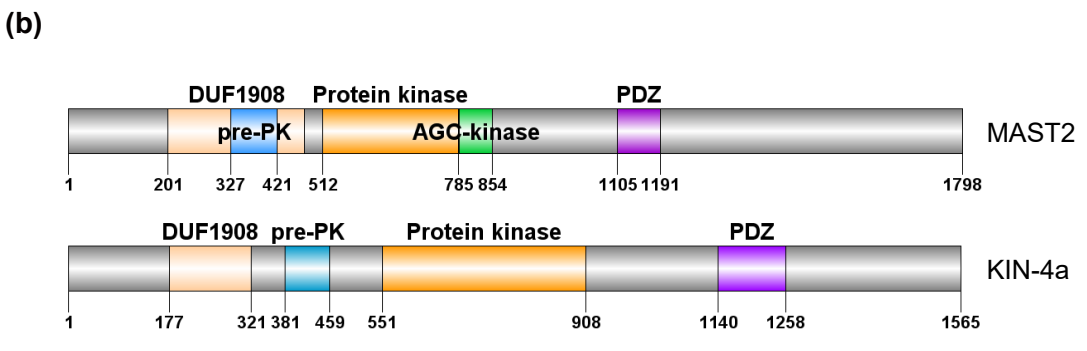

**Figure S4**

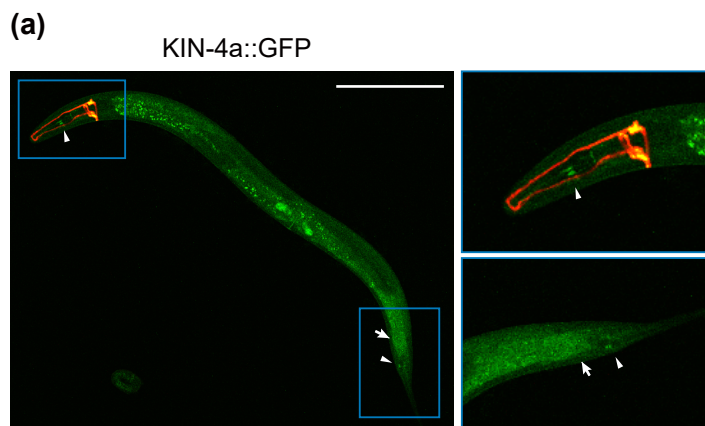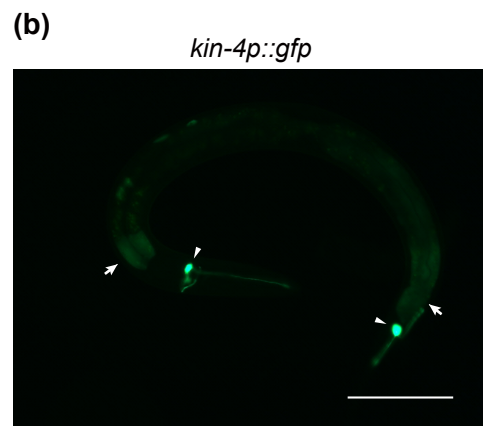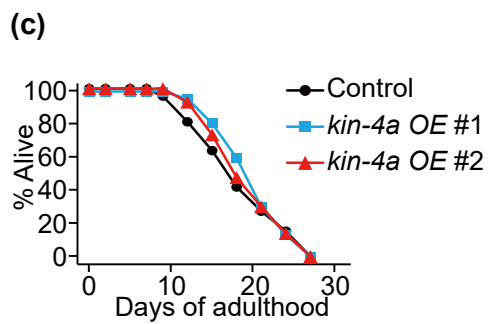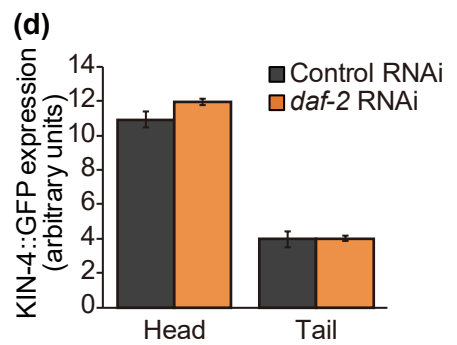

**Figure S5**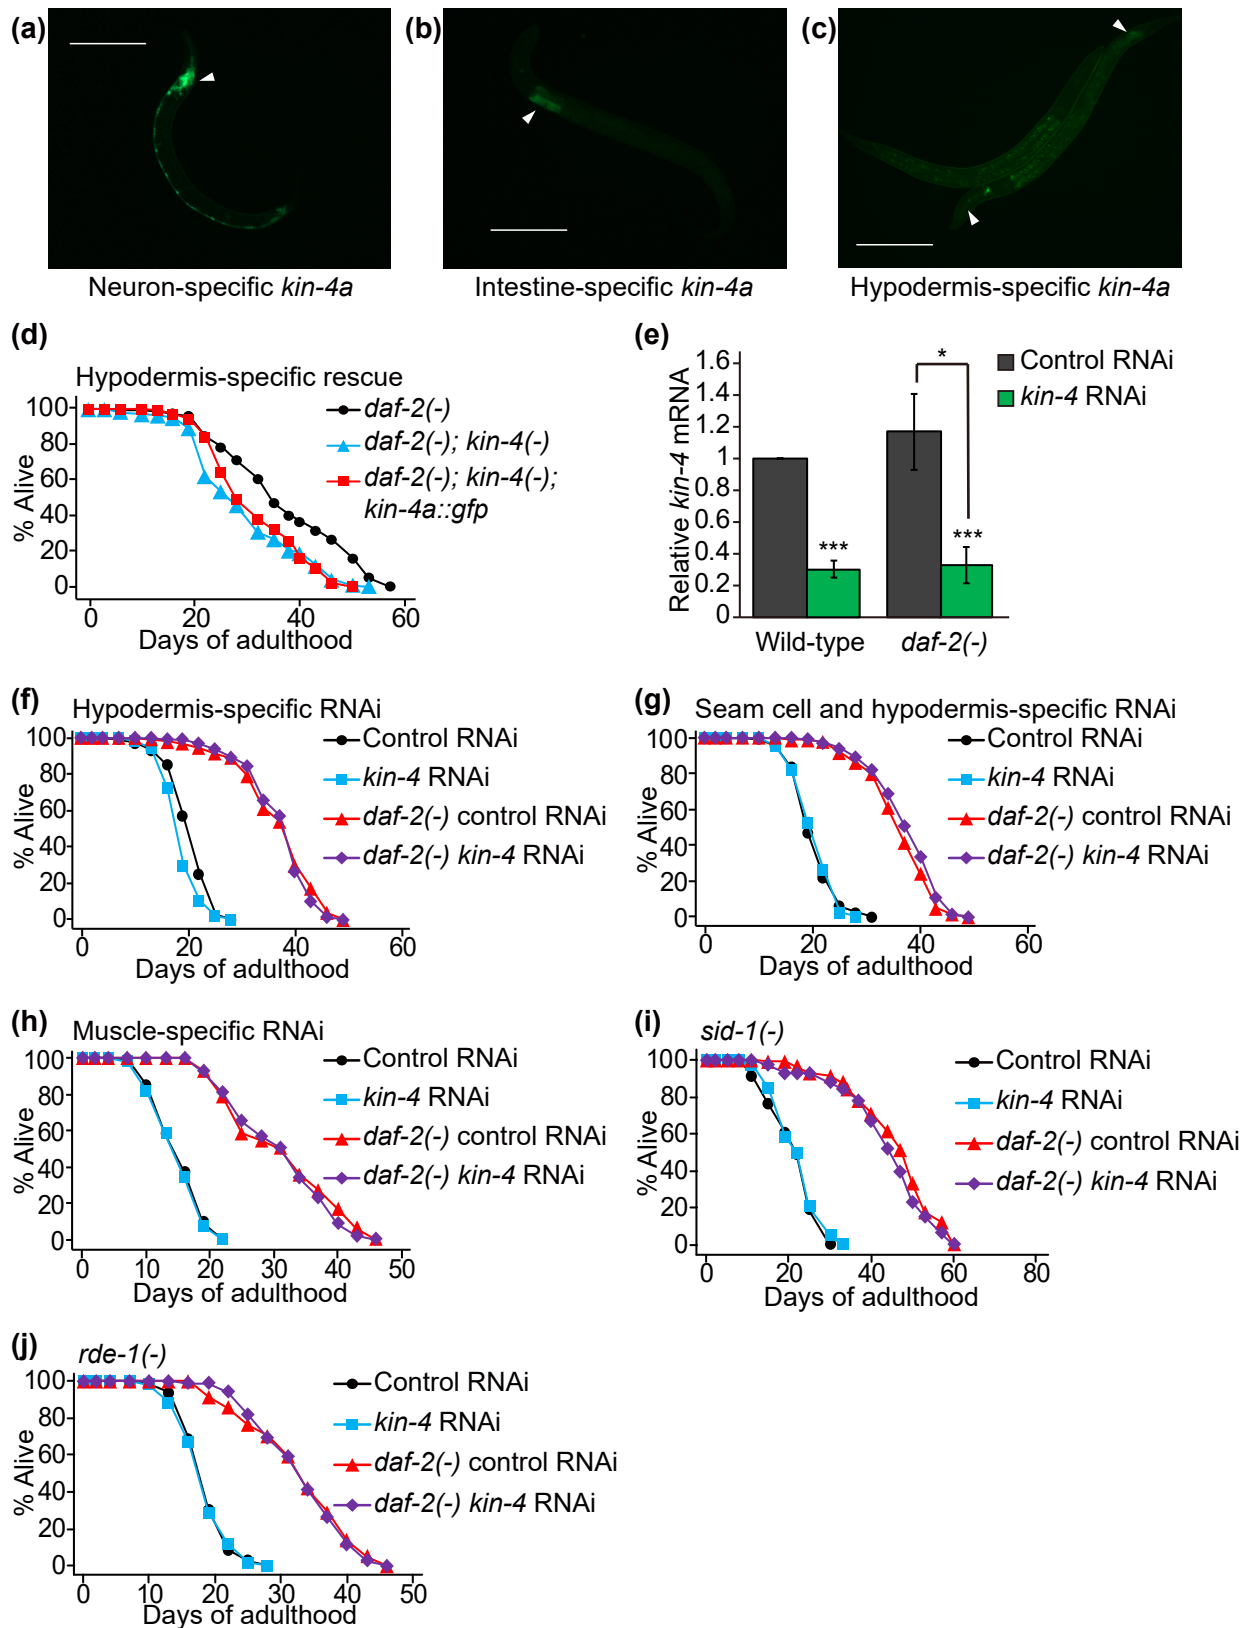

**Figure S6**

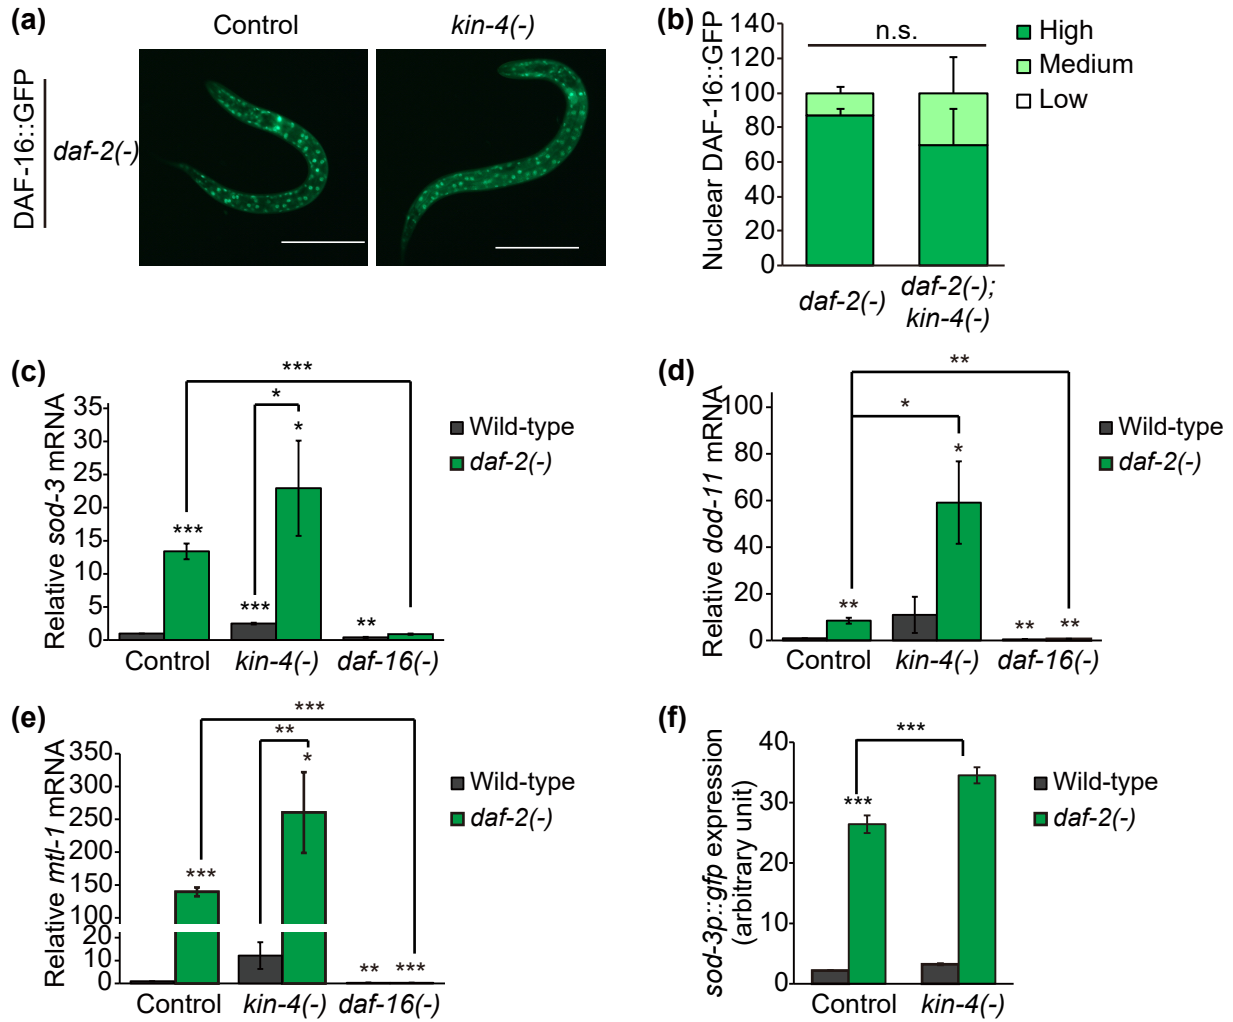

**Figure S7**

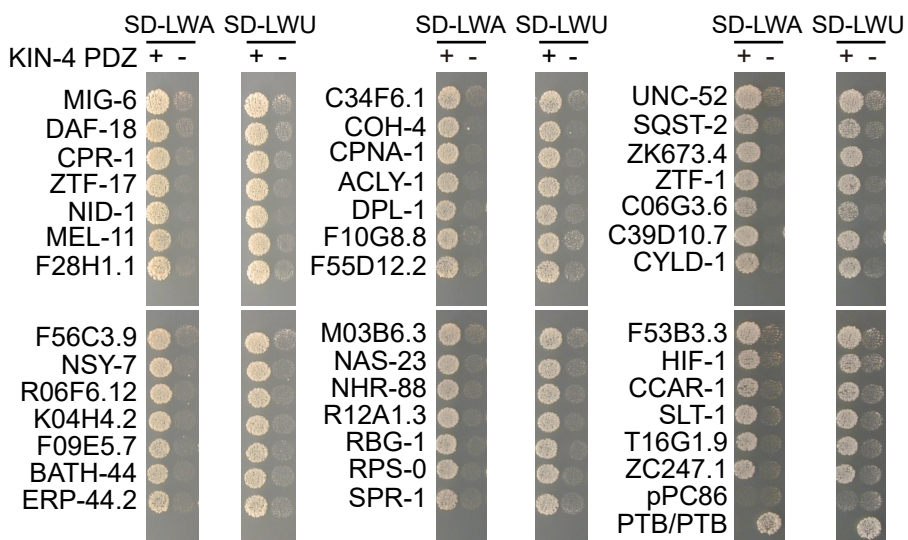

# Figure S8

PDZ-binding motif

|                              |     |   |     |   |   |   |   |   |   |   |   |   |
|------------------------------|-----|---|-----|---|---|---|---|---|---|---|---|---|
|                              | 951 |   | 962 |   |   |   |   |   |   |   |   |   |
| <i>C. elegans</i> DAF-18     | F   | S | D   | S | N | F | D | Q | A | I | Y | L |
|                              | 392 |   | 403 |   |   |   |   |   |   |   |   |   |
| <i>H. sapiens</i> PTEN       | F   | D | E   | D | Q | H | T | Q | I | T | K | V |
| <i>M. musculus</i> PTEN      | F   | D | E   | D | Q | I | T | Q | I | T | K | V |
| <i>X. laevis</i> PTEN        | F   | D | E   | D | Q | H | S | Q | I | T | K | V |
| <i>D. melanogaster</i> PTEN1 | G   | T | E   | D | G | E | E | D | W | E | S | E |



**Figure S9**

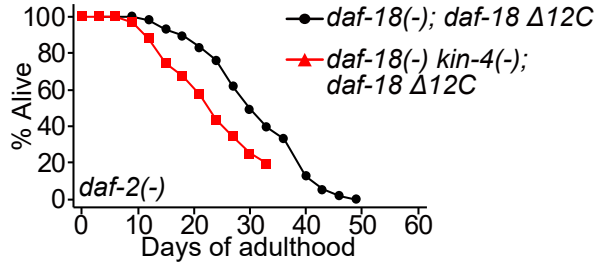

Supplement: ACEL-18-e12906-s002.pdf [file ACEL-18-e12906-s002.pdf]
